# Supplementary material
Source: Springer Nature journal article supplement (https://www.springermedizin.de/resource/supplementary/12986_2014_622_MOESM2_ESM.pdf/25655168)
Supplement: MOESM2 [file 25655168]

## Additional file 2: description of the low protein diet

### Modification of TestDiet® AIN-93M w/ No Protein

5B6A

#### DESCRIPTION

Mod TestDiet® AIN-93M without protein.

Storage conditions are particularly critical to TestDiet® products, due to the absence of antioxidants or preservative agents. To provide maximum protection against possible changes during storage, store in a dry, cool location. Storage under refrigeration (2° C) is recommended. Maximum shelf life is six months. (If long term studies are involved, storing the diet at -20° C or colder may prolong shelf life.) Be certain to keep in air tight containers.

**Product Forms Available\***      **Catalog #**  
Meal, Irradiated                      1813232

#### \*Other Forms Available On Re INGREDIENTS (%)

|                     |         |
|---------------------|---------|
| Corn Starch         | 60.5692 |
| Dextrin             | 15.5000 |
| Sucrose             | 10.0000 |
| Powdered Cellulose  | 5.0000  |
| Soybean Oil         | 4.0000  |
| AIN 93M Mineral Mix | 3.5000  |
| AIN 93 Vitamin Mix  | 1.0000  |
| Choline Bitartrate  | 0.2500  |
| L-Cystine           | 0.1800  |
| t-Butylhydroquinone | 0.0008  |

#### NUTRITIONAL PROFILE <sup>1</sup>

|                                      |             |                               |       |
|--------------------------------------|-------------|-------------------------------|-------|
| <b>Protein, %</b>                    | <b>0.7</b>  | <b>Minerals</b>               |       |
| Arginine, %                          | 0.00        | Calcium, %                    | 0.50  |
| Histidine, %                         | 0.00        | Phosphorus, %                 | 0.20  |
| Isoleucine, %                        | 0.00        | Phosphorus (available), %     | 0.00  |
| Leucine, %                           | 0.00        | Potassium, %                  | 0.36  |
| Lysine, %                            | 0.00        | Magnesium, %                  | 0.05  |
| Methionine, %                        | 0.00        | Sodium, %                     | 0.14  |
| Cystine, %                           | 0.18        | Chloride, %                   | 0.20  |
| Phenylalanine, %                     | 0.00        | Fluorine, ppm                 | 1.0   |
| Tyrosine, %                          | 0.00        | Iron, ppm                     | 35    |
| Threonine, %                         | 0.00        | Zinc, ppm                     | 30    |
| Tryptophan, %                        | 0.00        | Manganese, ppm                | 11    |
| Valine, %                            | 0.00        | Copper, ppm                   | 6.0   |
| Alanine, %                           | 0.00        | Cobalt, ppm                   | 0.0   |
| Aspartic Acid, %                     | 0.00        | Iodine, ppm                   | 0.21  |
| Glutamic Acid, %                     | 0.00        | Chromium, ppm                 | 1.0   |
| Glycine, %                           | 0.00        | Molybdenum, ppm               | 0.14  |
| Proline, %                           | 0.00        | Selenium, ppm                 | 0.17  |
| Serine, %                            | 0.00        |                               |       |
| Taurine, %                           | 0.00        | <b>Vitamins</b>               |       |
|                                      |             | Vitamin A, IU/g               | 4.0   |
| <b>Fat, %</b>                        | <b>4.1</b>  | Vitamin D-3 (added), IU/g     | 1.0   |
| Cholesterol, ppm                     | 0           | Vitamin E, IU/kg              | 78.8  |
| Linoleic Acid, %                     | 2.04        | Vitamin K (as menadione), ppm | 0.29  |
| Linolenic Acid, %                    | 0.31        | Thiamin Hydrochloride, ppm    | 6.0   |
| Arachidonic Acid, %                  | 0.00        | Riboflavin, ppm               | 6.0   |
| Omega-3 Fatty Acids, %               | 0.31        | Niacin, ppm                   | 30    |
| Total Saturated Fatty A              | 0.60        | Pantothenic Acid, ppm         | 15    |
| Total Monounsaturated Fatty Acids, % | 0.88        | Folic Acid, ppm               | 2.0   |
| Polyunsaturated Fatty Acids, %       | 2.16        | Pyridoxine, ppm               | 5.8   |
|                                      |             | Biotin, ppm                   | 0.2   |
| <b>Fiber (max), %</b>                | <b>5.1</b>  | Vitamin B-12, mcg/kg          | 25    |
|                                      |             | Choline Chloride, ppm         | 1,250 |
| <b>Carbohydrates, %</b>              | <b>87.0</b> | Ascorbic Acid, ppm            | 0.0   |
| <b>Energy (kcal/g) <sup>2</sup></b>  | <b>3.85</b> |                               |       |
| <b>From:</b>                         | <b>kcal</b> | <b>%</b>                      |       |
| Protein                              | 0.029       | 0.8                           |       |
| Fat (ether extract)                  | 0.371       | 9.6                           |       |
| Carbohydrates                        | 3.462       | 89.7                          |       |

1. Formulation based on calculated values from the latest ingredient analysis information. Since nutrient composition of natural ingredients varies and some nutrient loss will occur due to manufacturing processes, analysis will differ accordingly. Nutrients expressed as percent of ration on an As-Fed basis except where otherwise indicated.

2. Energy (kcal/gm) - Sum of decimal fractions of protein, fat and carbohydrate x 4,9,4 kcal/gm respectively.

#### FEEDING DIRECTIONS

Feed ad libitum. Plenty of fresh, clean water should be available at all times.

#### CAUTION:

Perishable - store properly upon receipt. For laboratory animal use only; NOT for human consumption.

2/4/2010

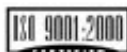

**TestDiet**  
www.testdiet.com
